# Supplementary material for: ANMM4CBR: a case-based reasoning method for gene expression data classification
Source: Springer Nature journal article supplement (doi:10.1186/1748-7188-5-14), 2010-01-06
Supplement: 13015_2009_87_MOESM3_ESM.pdf [file 13015_2009_87_MOESM3_ESM.pdf]

1. **Given:** Samples  $\{x_i\}_{i=1}^N$ , features  $\{\phi_m\}_{m=1}^M$ ,  $\{\text{flag}_m\}_{m=1}^M$ .

2. **Initialize:**  $\forall x_i, w_0(x_i) = 1/N$ ;  $\forall m, \text{flag}_m = \text{true}$ .

3. **For**  $t = 1 : T$

a. **For**  $m = 1 : M$

If ( $\text{flag}_m == \text{true}$ ), calculate:

$$Z_m = \sum_{i=1}^N w_t(x_i) \left[ \min_j \left\{ (\phi_t(x_i) - \phi_t(x_j))^2 \mid y_i \neq y_j \right\} - \max_l \left\{ (\phi_t(x_i) - \phi_t(x_l))^2 \mid C[x_i] = C[x_l] \right\} \right].$$

b. Find  $m^* = \arg \max_m Z_m$ , let  $h_t = \phi_{m^*}$ , set  $\text{flag}_m = \text{false}$ .

c. Weight updating according to Equation (11).

4. **Output:**  $\{h_t\}_{t=1}^T$ .
