# Supplementary material for: ANMM4CBR: a case-based reasoning method for gene expression data classification
Source: Springer Nature journal article supplement (doi:10.1186/1748-7188-5-14), 2010-01-06

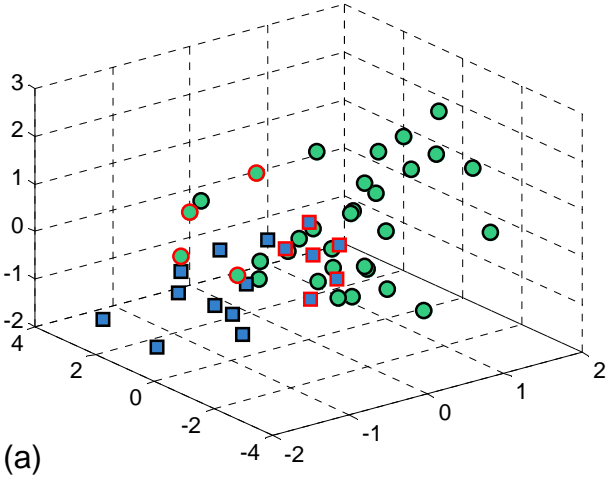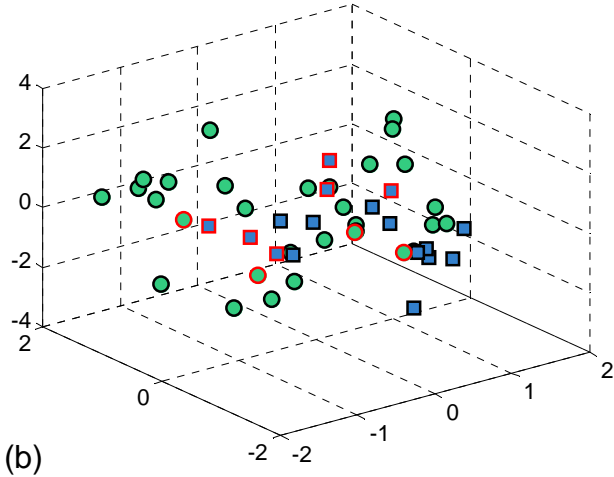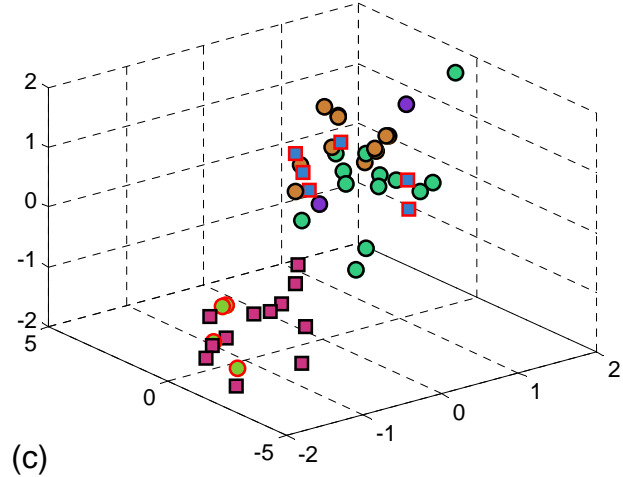

Supplement: 13015_2009_87_MOESM4_ESM.pdf [file 13015_2009_87_MOESM4_ESM.pdf]
